# Supplementary material for: Capacity-weighted figures-of-merit for battery transport metrics
Source: Royal Society of Chemistry journal article supplement (doi:10.1039/d4ta06041e), 2024-12-18
Supplement: d4ta06041e1.pdf [file d4ta06041e1.pdf]

## Supplemental Information

### Capacity-Weighted Figures-of-Merit for Battery Transport Metrics

CJ Sturgill,<sup>1</sup> Christopher Sutton,<sup>1</sup> Julian Schwenzel,<sup>2</sup> Morgan Stefik<sup>1\*</sup>

1) CJ Sturgill, C. Sutton, M. Stefik

Department of Chemistry and Biochemistry, University of South Carolina, Columbia, SC 29201.

E-mail: morgan@stefikgroup.com

2) J. Schwenzel

Fraunhofer Institute of Advanced Manufacturing Technology and Advanced Materials IFAM,  
Wiener Strasse 12, 28359 Bremen (Germany)

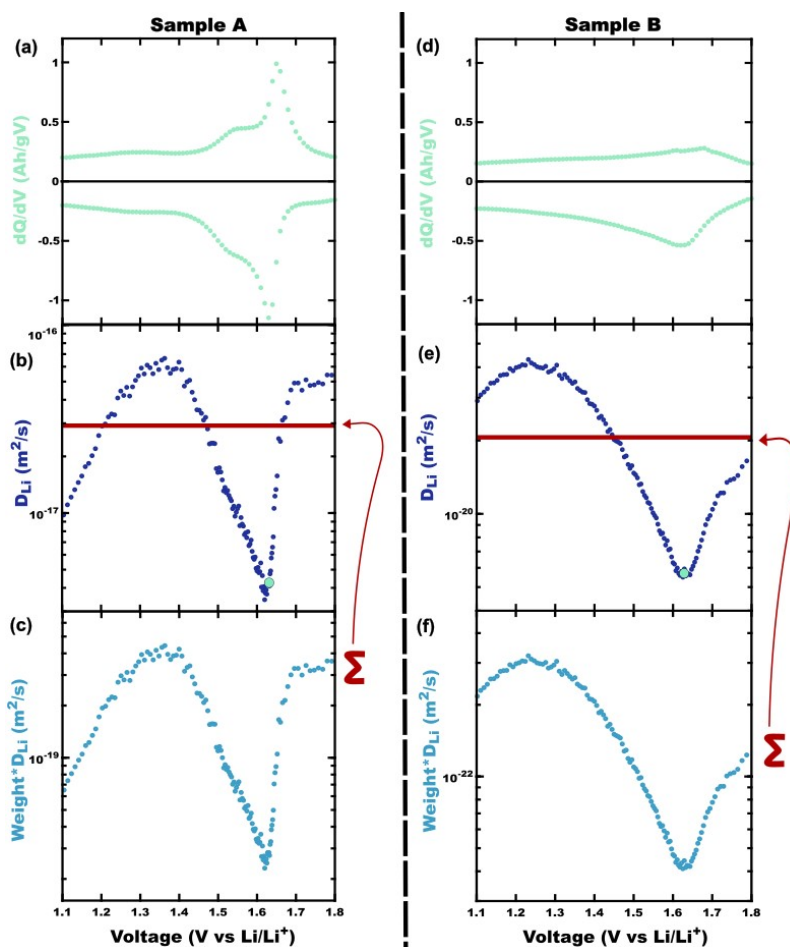

**Supplemental S1.** Repeat of Figure 2 from main text using the  $dQ/dV$  from the ICI technique itself (a,d). The resulting weighing function is constant and without noise. Therefore, using the diffusivities from ICI (b,e), the weighted diffusivities (c,f) can be summed to get  $D_{Qav}$ .

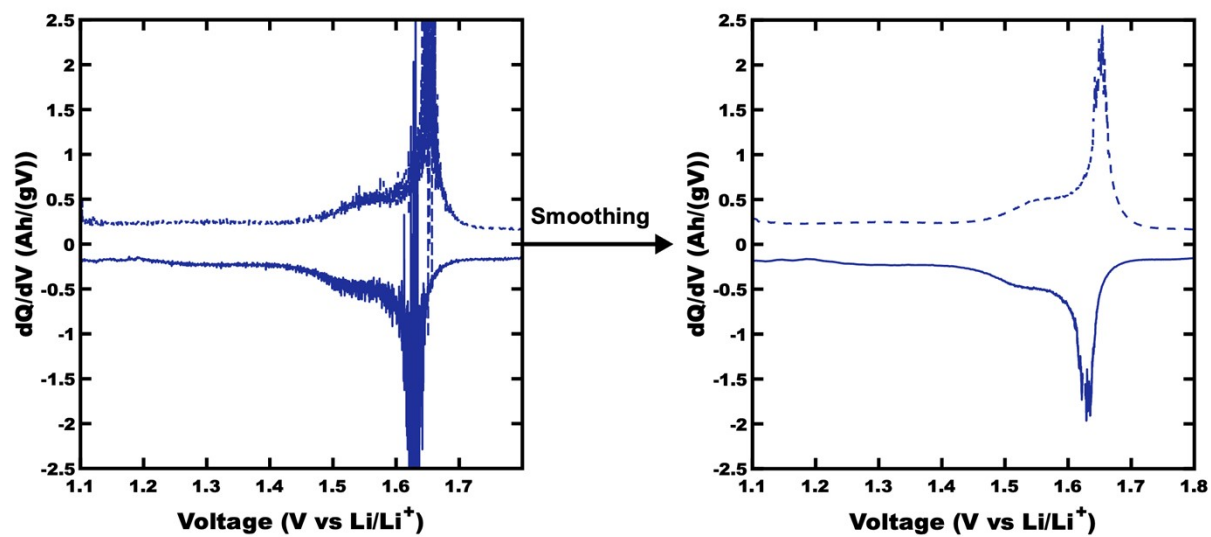

**Supplemental S2.** The  $dQ/dV$  data for Sample A (a) both the direct derivative and (b) after smoothing and re-binning.
